# Supplementary material for: Second round statewide survey for estimation of the burden of active infection and anti-SARS-CoV-2 IgG antibodies in the general population of Karnataka, India
Source: medRxiv preprint, doi:10.1101/2021.08.10.21261842, version 1 (2021-08-11)
Supplement: Supplementary Figure 2 [file 261842_file03.docx]

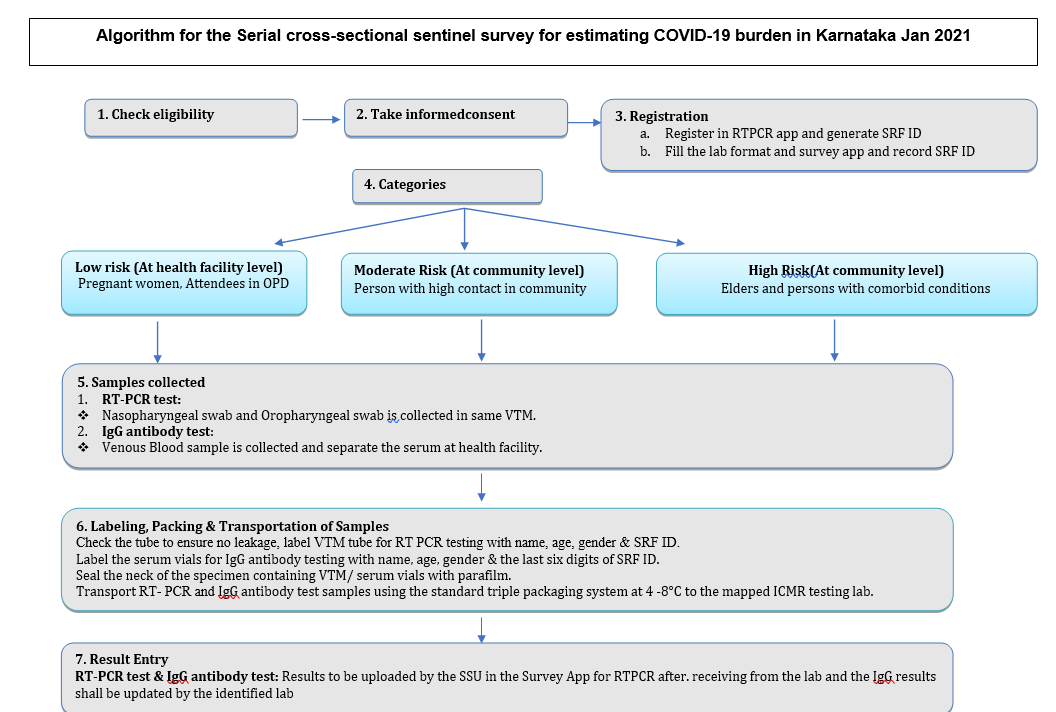


**Supplementary Figure 2: Algorithm for the serial cross-sectional sentinel survey for estimating COVID-19 burden in Karnataka.**
